# Supplementary material for: The Inhibitory Effect of Protamine on Platelets is Attenuated by Heparin without Inducing Thrombocytopenia in Rodents
Source: PubMed Central journal article supplement (PMC6780366; doi:10.3390/md17090539), 2019-09-17
Supplement: marinedrugs-17-00539-s001.pdf [file marinedrugs-17-00539-s001.pdf]

## Supplementary Data

# The Inhibitory Effect of Protamine on Platelets is Attenuated by Heparin without Inducing Thrombocytopenia in Rodents

Joanna Miklosz <sup>1</sup>, Bartłomiej Kalaska <sup>1</sup>, Kamil Kaminski <sup>2</sup>, Malgorzata Rusak <sup>3</sup>, Krzysztof Szczubialka <sup>2</sup>, Maria Nowakowska <sup>2</sup>, Dariusz Pawlak <sup>1</sup> and Andrzej Mogielnicki <sup>1,\*</sup>

<sup>1</sup> Department of Pharmacodynamics, Medical University of Bialystok, 15-222 Bialystok, Poland

<sup>2</sup> Department of Physical Chemistry, Faculty of Chemistry, Jagiellonian University, 30-387 Krakow, Poland

<sup>3</sup> Department of Haematological Diagnostics, Medical University of Bialystok, 15-269 Bialystok, Poland

\* Correspondence: andrzej.mogielnicki@umb.edu.pl; Tel.: +48-85-748-5889

**Table S1.** The percentage of cells of various categories in bone marrow of mice on the 35<sup>th</sup> day of the experiment.

| Parameter                       | VEH          | UFH               | UFH + PS             | PS                    |
|---------------------------------|--------------|-------------------|----------------------|-----------------------|
| <b>Erythroid (E)</b>            |              |                   |                      |                       |
| Proerythroblasts                | 1.5 (0–3)    | 1.5 (0–4)         | 1.5 (0–6)            | 0.5 (0–3)             |
| Basophilic erythroblasts        | 6.0 (3–7)    | 4.5 (3–9)         | <b>3.0 (0–4)**</b>   | 4.0 (1–7)             |
| Polychromatic erythroblasts     | 9.0 (7–15)   | 7.5 (1–14)        | 8.5 (4–11)           | <b>6.5 (4–11)*</b>    |
| Oxyphilic erythroblasts         | 6.5 (4–10)   | 5.0 (1–10)        | 5.5 (5–9)            | 6.5 (3–9)             |
| <b>Total of erythroid cells</b> | 21.5 (18–30) | 19.0 (7–29)       | 17.5 (9–24)          | <b>15.5 (12–24)*</b>  |
| <b>Myeloid (M)</b>              |              |                   |                      |                       |
| Myeloblasts                     | 0.0 (0–2)    | 0.0 (0–1)         | 0.0 (0–2)            | 0.0 (0–1)             |
| Promyelocytes                   | 5.5 (3–11)   | <b>3.5 (1–5)*</b> | 5.5 (3–10)           | <b>3.5 (2–7)*</b>     |
| Myelocytes                      | 21.5 (17–25) | 21.5 (19–24)      | 20.5 (19–26)         | 21.5 (20–26)          |
| Metamyelocytes                  | 16.0 (13–18) | 17.0 (15–23)      | <b>18.0 (15–22)*</b> | <b>18.0 (15–25)**</b> |
| Band                            | 19.0 (10–23) | 20.0 (13–26)      | 19.0 (18–21)         | 20.5 (16–23)          |
| Neutrophils                     | 14.0 (6–22)  | 13.5 (9–25)       | 15.0 (11–19)         | 16.0 (8–31)           |
| Eosinophils                     | -            | -                 | 0.0 (0–1)            | -                     |
| Basophils                       | -            | -                 | -                    | -                     |
| <b>Total of myeloid cells</b>   | 75.5 (65–83) | 75.5 (68–92)      | 79.5 (74–88)         | 79.5 (73–90)          |
| Lymphocytes                     | 4.0 (3–7)    | <b>2.0 (1–8)*</b> | <b>2.0 (1–3)***</b>  | 3.0 (0–4)             |
| Monocytes                       | 0.0 (0–1)    | 0.5 (0–2)         | 0.0 (0–1)            | 0.5 (0–1)             |
| <b>M/E ratio</b>                | 3:1          | 4:1               | 4:1                  | 5:1                   |

Abbreviations: VEH: vehicle, UFH: unfractionated heparin, PS: protamine sulfate. \* $p < 0.05$ , \*\* $p < 0.01$ , \*\*\* $p < 0.001$  vs vehicle, Kruskal-Wallis ANOVA with Dunn's post hoc test. Results are shown as median with range;  $n = 8$ .

**Table S2.** Complete blood count in rats after UFH and PS administration alone or in combination during the one-hour observation and on the 35<sup>th</sup> day of the experiment.

| Parameter                                  | T      | VEH              | UFH 150 U/kg             | UFH 150 U/kg + PS 1.5 mg/kg | PS 1.5 mg/kg              |
|--------------------------------------------|--------|------------------|--------------------------|-----------------------------|---------------------------|
| WBC<br>(10 <sup>3</sup> /mm <sup>3</sup> ) | 15 min | 4.8 (1.9–6.8)    | 3.7 (3.6–7.8)            | 4.0 (3.3–6.5)               | 3.6(2.2–5.5)              |
|                                            | 30 min | 4.3 (2.0–6.4)    | 3.5 (3.2–4.1)            | 4.1 (1.1–10.1)              | 3.8 (3.2–5.1)             |
|                                            | 60 min | 2.2 (1.6–6.4)    | <b>2.9 (2.1–3.3)^</b>    | 3.1 (2.4–9.8)               | <b>2.3 (2.1–4.3)#</b>     |
|                                            | 35 day | 3.2 (2.3–3.9)    | 3.0 (2.4–4.1)            | 2.7 (1.8–3.6)               | 3.1 (1.9–6.1)             |
| RBC<br>(10 <sup>6</sup> /mm <sup>3</sup> ) | 15 min | 7.1 (6.6–8.1)    | 7.4 (6.7–8.1)            | 7.1 (6.4–7.9)               | 7.2 (6.9–8.3)             |
|                                            | 30 min | 7.1 (6.9–8.1)    | 7.2 (7.0–7.9)            | 7.2 (6.7–8.1)               | 7.1 (6.8–8.3)             |
|                                            | 60 min | 6.5 (5.8–7.9)    | <b>7.0 (6.2–7.9)^</b>    | <b>6.6 (6.3–7.9)^ ##</b>    | <b>6.6 (5.7–7.0)^#</b>    |
|                                            | 35 day | 8.8 (7.7–9.2)    | 8.5 (8.2–9.3)            | 8.6 (7.9–9.4)               | 8.8 (8.5–9.2)             |
| HGB<br>(g/dl)                              | 15 min | 14.6 (13.4–14.9) | 14.0 (13.2–14.8)         | 14.1 (13.5–15.4)            | 14.0 (13.8–15.6)          |
|                                            | 30 min | 14.8 (13.2–14.9) | 13.7 (12.7–13.9)         | 13.7 (13.4–15.7)            | 14.0 (13.3–15.4)          |
|                                            | 60 min | 12.5 (11.3–15.3) | 13.1 (12.9–13.9)         | <b>12.8 (12.2–15.4)^#</b>   | <b>12.7 (10.9–14.1)^#</b> |
|                                            | 35 day | 15.9 (14.5–16.8) | 15.9 (15.2–16.5)         | 15.8 (14.6–17.1)            | 16.6 (15.2–17.2)          |
| HCT<br>(%)                                 | 15 min | 44.2 (38.4–47.0) | 43.5 (41.7–46.5)         | 44.2 (41.1–46.2)            | 43.8 (43.2–49.4)          |
|                                            | 30 min | 45.2 (41.5–46.8) | 42.5 (39.9–43.5)         | 43.2 (41.6–48.1)            | 43.93 (41.7–49.2)         |
|                                            | 60 min | 38.7 (35.4–46.9) | <b>41.3 (40.8–43.8)^</b> | <b>39.6 (37.9–46.6)^ #</b>  | <b>39.7 (37.4–42.8)^#</b> |
|                                            | 35 day | 48.7 (44.3–50.9) | 48.1 (45.6–51.3)         | 48.0 (43.8–51.6)            | 48.9 (46.9–52.5)          |
| MCV<br>(µm <sup>3</sup> )                  | 15 min | 60.0 (58–63)     | 59.0 (57–60)             | 60.0 (59–62)                | 60.5 (59–63)              |
|                                            | 30 min | 60.0 (58–64)     | 59.0 (57–60)             | 60.0 (59–62)                | 60.5 (59–63)              |
|                                            | 60 min | 59.0 (57–)64     | 59.0 (57–60)             | 60.0 (59–62)                | 60.0 (59–63)              |
|                                            | 35 day | 56.0 (54–58)     | 56.0 (55–58)             | 56.0 (55–58)                | 55.0 (53–58)              |
| MCH<br>(pg)                                | 15 min | 20.0 (18.5–21.0) | <b>18.8 (18.2–19.0)*</b> | 19.6 (18.9–20.4)            | 19.3 (18.7–20.1)          |
|                                            | 30 min | 19.1 (18.3–21.0) | 18.6 (18.1–19.3)         | <b>19.3 (18.8–20.3)^</b>    | 19.3 (18.5–20.0)          |
|                                            | 60 min | 18.9 (18.3–21.6) | 18.5 (18.0–19.2)         | <b>19.3 (18.7–20.2)^</b>    | 19.3 (18.8–20.3)          |
|                                            | 35 day | 18.5 (17.6–19.0) | 18.5 (17.7–19.2)         | 18.6 (18.2–19.0)            | 18.3 (17.3–19.4)          |
| MCHC<br>(g/dl)                             | 15 min | 32.9 (31.2–34.9) | 31.7 (31.4–32.2)         | 32.2 (31.4–33.3)            | 31.9 (31.5–32.3)          |
|                                            | 30 min | 31.7 (31.4–33.0) | 31.9 (31.5–32.7)         | <b>32.0 (31.6–32.7)^</b>    | 31.9 (31.2–32.5)          |
|                                            | 60 min | 31.9 (31.7–35.4) | 31.8 (31.3–32.6)         | 32.1 (31.5–33.1)            | 32.2 (31.4–33.0)          |
|                                            | 35 day | 33.0 (32.1–33.6) | 32.9 (32.2–33.7)         | 33.1 (32.8–33.7)            | 32.8 (32.3–34.0)          |

Abbreviations: WBC: white blood cells, RBC: red blood cells, HGB: hemoglobin, HCT: haematocrit, MCV: mean corpuscular volume, MCH: mean corpuscular haemoglobin, MCHC: mean corpuscular haemoglobin concentration, T: time, UFH: unfractionated heparin, PS: protamine sulfate. \*  $p < 0.05$  vs vehicle at the corresponding time point, Kruskal-Wallis ANOVA with Dunn's post hoc test; ^  $p < 0.05$ , ^^  $p < 0.001$  vs 15 min within same group; #  $p < 0.05$ , ##  $p < 0.01$  vs 30 min within same group, Friedman ANOVA with Dunn's post hoc test. Results are shown as median with range;  $n = 5-10$ .

**Table S3.** Complete blood count in mice at 3, 15 and 60 min, and on the 35<sup>th</sup> day after UFH and PS administration alone or in combination.

| Parameter                                  | T      | VEH              | UFH 150 U/kg             | UFH 150 U/kg + PS 1.5 mg/kg | PS 1.5 mg/kg         |
|--------------------------------------------|--------|------------------|--------------------------|-----------------------------|----------------------|
| WBC<br>(10 <sup>3</sup> /mm <sup>3</sup> ) | 3 min  |                  | 0.8 (0.2–1.3)            | 0.5 (0.2–0.6)               | 0.3 (0.2–1.7)        |
|                                            | 15 min | 0.6 (0.4–1.0)    | <b>0.4 (0.2–0.5)*</b>    | 0.5 (0.2–0.8)               | 1.5 (0.4–6.4)        |
|                                            | 60 min | 1.5 (1.4–2.2)    | 1.8 (1.2–2.7)            | 1.7 (1.2–2.3)               | 1.7 (1.3–2.9)        |
|                                            | 35 day | 1.8 (0.8–4.5)    | 1.4 (0.9–2.2)            | 1.6 (0.7–5.5)               | 1.4 (0.4–2.1)        |
| RBC<br>(10 <sup>6</sup> /mm <sup>3</sup> ) | 3 min  |                  | <b>7.1 (5.9–7.9)*</b>    | <b>7.0 (6.6–7.1)**</b>      | 7.2 (6.2–7.8)        |
|                                            | 15 min | 7.4 (7.1–7.6)    | 7.1 (6.6–8.1)            | <b>7.0 (6.5–7.4)*</b>       | 7.4 (6.6–7.8)        |
|                                            | 60 min | 7.2 (6.9–8.1)    | 7.6 (6.9–7.9)            | 7.6 (7.5–7.6)               | 7.6 (6.9–7.9)        |
|                                            | 35 day | 4.3 (4.0–4.6)    | 4.2 (3.9–4.5)            | 4.2 (4.0–4.5)               | 4.2 (4.0–4.3)        |
| HGB<br>(g/dl)                              | 3 min  |                  | 12.3 (10.6–14.1)         | <b>11.8 (11.2–12.1)**</b>   | 12.1 (10.5–13.4)     |
|                                            | 15 min | 12.7 (12.4–13.0) | 12.2 (11.0–14.1)         | <b>11.9 (11.1–12.8)*</b>    | 12.4 (11.3–13.5)     |
|                                            | 60 min | 11.9 (11.4–13.1) | 12.2 (10.8–13.2)         | 12.4 (12.1–12.9)            | 12.4 (11.6–13.0)     |
|                                            | 35 day | 12.7 (12.3–13.1) | 12.4 (11.0–12.8)         | <b>12.0 (11.5–13.2)*</b>    | 12.3 (11.7–12.8)     |
| HCT<br>(%)                                 | 3 min  |                  | 40.0 (33.9–44.1)         | <b>38.6 (38.1–40.9)*</b>    | 40.1 (34.4–43.3)     |
|                                            | 15 min | 41.4 (39.5–41.9) | 40.2 (36.3–44.8)         | 39.1 (36.8–42.2)            | 41.8 (36.5–44.3)     |
|                                            | 60 min | 37.9 (36.2–43.6) | 39.7 (35.2–43.2)         | 40.7 (40.1–41.5)            | 40.1 (36.9–42.3)     |
|                                            | 35 day | 33.0 (31.3–35.7) | 32.6 (30.5–35.0)         | 32.6 (31.1–34.8)            | 32.1 (31.0–33.0)     |
| MCV<br>(µm <sup>3</sup> )                  | 3 min  |                  | <b>57.0 (54–58)**</b>    | <b>57.0 (55–58)*</b>        | 56.0 (55–57)         |
|                                            | 15 min | 55.0 (54–56)     | 56.0 (55–58)             | <b>56.5 (55–57)*</b>        | <b>56.0 (55–57)*</b> |
|                                            | 60 min | 53.0 (53.0–54.0) | 52.0 (51.0–55.0)         | 54.0 (53.0–55.0)            | 53.5 (52.0–54.0)     |
|                                            | 35 day | 78.0 (76–79)     | 78.0 (77–78)             | 77.0 (76–78)                | 77.0 (76–78)         |
| MCH<br>(pg)                                | 3 min  |                  | 17.6 (17.1–17.9)         | 16.9 (16.1–17.7)            | 17.2 (16.8–17.7)     |
|                                            | 15 min | 17.4 (16.9–17.5) | 17.2 (16.8–17.8)         | 17.1 (16.4–17.8)            | 17.1 (16.5–17.5)     |
|                                            | 60 min | 16.6 (16.2–16.6) | 16.6 (15.8–16.8)         | 16.4 (16.1–17.0)            | 16.4 (16.2–16.9)     |
|                                            | 35 day | 29.4 (28.2–31.1) | 28.3 (28.1–29.5)         | 29.0 (27.4–29.4)            | 29.8 (28.8–30.2)     |
| MCHC<br>(g/dl)                             | 3 min  |                  | 30.7 (30.1–32.4)         | <b>29.2 (29.1–31.6)*</b>    | 30.7 (29.6–31.7)     |
|                                            | 15 min | 31.2 (30.6–31.9) | 30.8 (29.3–31.9)         | <b>30.4 (29.0–31.9)*</b>    | 30.8 (28.8–31.2)     |
|                                            | 60 min | 31.4 (30.0–31.5) | 30.9 (30.6–31.7)         | 30.6 (29.8–31.0)            | 30.9 (30.7–31.5)     |
|                                            | 35 day | 38.2 (36.6–39.4) | <b>36.7 (36.0–38.0)*</b> | 37.5 (35.8–38.0)            | 38.8 (37.0–39.2)     |

Abbreviations: WBC: white blood cells, RBC: red blood cells, HGB: hemoglobin, HCT: haematocrit, MCV: mean corpuscular volume, MCH: mean corpuscular haemoglobin, MCHC: mean corpuscular haemoglobin concentration, T: time, UFH: unfractionated heparin, PS: protamine sulfate. \* $p < 0.05$ , \*\* $p < 0.01$  vs vehicle, Kruskal-Wallis ANOVA with Dunn's post hoc test. Results are shown as median with range;  $n = 5-8$ .
